# Supplementary material for: Metagenomic Analysis Reveals A Gut Microbiota Structure and Function Alteration between Healthy and Diarrheic Juvenile Yaks
Source: MDPI journal article supplement (doi:10.3390/ani14081181), 2024-04-14
Supplement: s1 [file s1]

# Metagenomic Analysis Reveals Gut Microbiota Structure and Function Alteration between Healthy and Diarrheic Juvenile Yaks

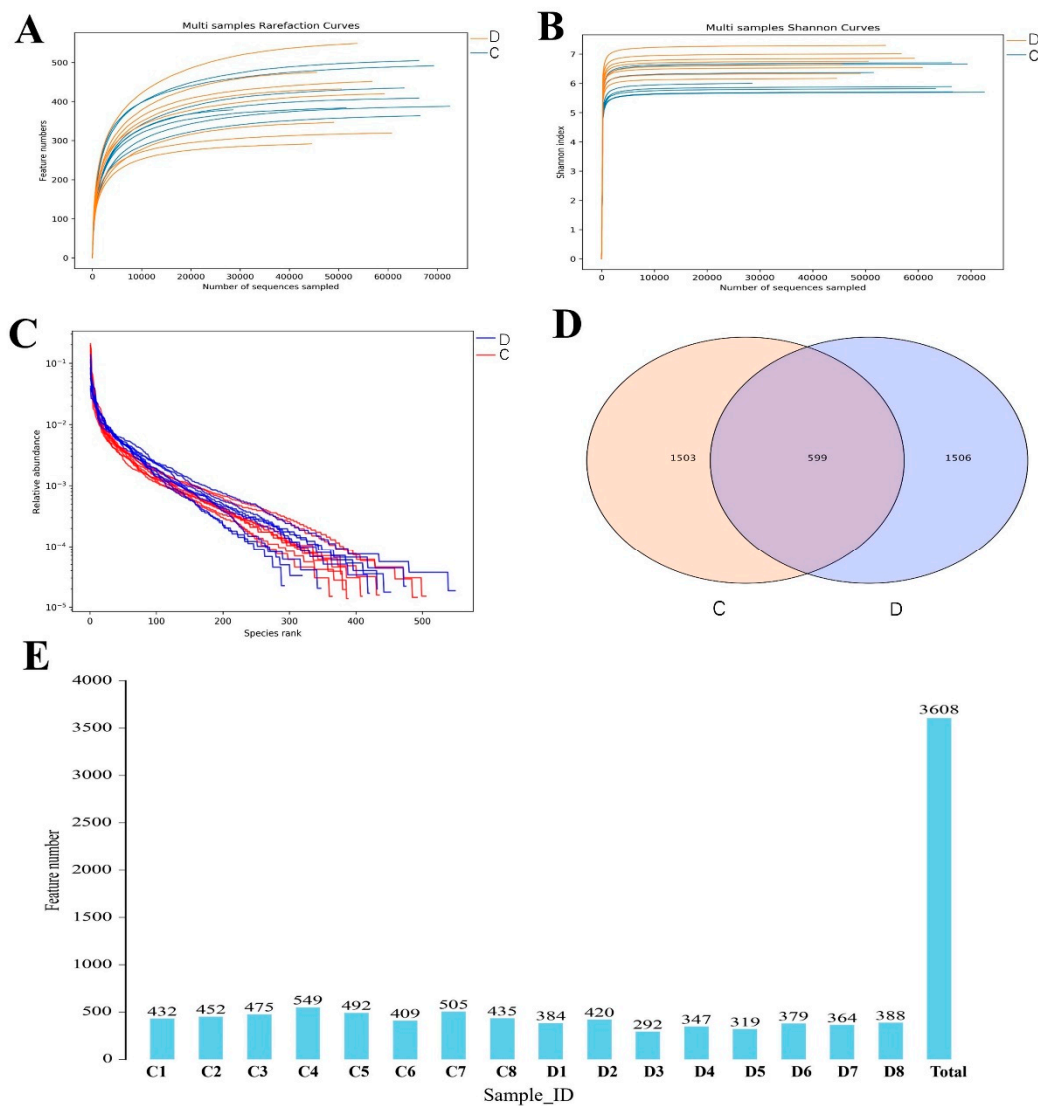

**Figure S1.** Analysis of sequencing depth and distribution of operational taxonomic units (OTUs) in the gut microbiota of groups C and D. The evaluation of gut microbial sequencing depth and evenness was performed using rarefaction (A, B) and rank (C) abundance curves. (D) Venn diagrams illustrate the distribution of common and distinct OTUs in each sample. (E) Quantity of OTUs in each sample.

Supplement Table S1

The information of the yak.

| Sample               | Age (60±5) | Gender | breed (Bos grunniens) | Body weight (kg) |
|----------------------|------------|--------|-----------------------|------------------|
| C1 (Control Group1)  | 56         | Male   | maiwa yak             | 23.17            |
| C2 (Control Group 2) | 61         | Male   | maiwa yak             | 22.16            |
| C3(Control Group 3)  | 60         | Male   | maiwa yak             | 23.63            |
| C4(Control Group 4)  | 55         | Male   | maiwa yak             | 24.23            |
| C5(Control Group 5)  | 62         | Female | maiwa yak             | 21.36            |
| C6(Control Group 6)  | 64         | Female | maiwa yak             | 22.36            |
| C7(Control Group 7)  | 65         | Female | maiwa yak             | 24.03            |
| C8(Control Group 8)  | 60         | Female | maiwa yak             | 22.30            |
| D1(Diarrhea Group1)  | 62         | Male   | maiwa yak             | 21.03            |
| D2(Diarrhea Group2)  | 58         | Male   | maiwa yak             | 20.36            |
| D3(Diarrhea Group3)  | 64         | Male   | maiwa yak             | 20.99            |
| D4(Diarrhea Group4)  | 56         | Male   | maiwa yak             | 19.96            |
| D5(Diarrhea Group5)  | 55         | Female | maiwa yak             | 21.23            |
| D6(Diarrhea Group6)  | 60         | Female | maiwa yak             | 20.57            |
| D7(Diarrhea Group7)  | 65         | Female | maiwa yak             | 21.03            |
| D8(Diarrhea Group8)  | 61         | Female | maiwa yak             | 19.77            |

**Table S2**

Shifts in the gut microbial composition at the phylum and genus levels in yaks during diarrhea. C and D indicate control and diarrhea groups, respectively. Data were indicated as mean  $\pm$  SD.

| <b>Taxa</b>                                | <b>C (%)</b>      | <b>D(%)</b>      | <b>P</b> |
|--------------------------------------------|-------------------|------------------|----------|
| <b>Bacteroidota</b>                        | 11.54 $\pm$ 1.64  | 51.25 $\pm$ 2.71 | 0.000999 |
| <b>Firmicutes</b>                          | 81.06 $\pm$ 1.32  | 35.53 $\pm$ 1.58 | 0.000999 |
| <b>Proteobacteria</b>                      | 0.51 $\pm$ 0.17   | 6.87 $\pm$ 1.63  | 0.00199  |
| <b>unclassified_Lachnospiraceae</b>        | 31.60 $\pm$ 4.68  | 6.77 $\pm$ 1.28  | 0.000999 |
| <b>Lactobacillus</b>                       | 14.65 $\pm$ 3.92  | 2.47 $\pm$ 0.65  | 0.000999 |
| <b>Lachnospiraceae_NK4A136_group</b>       | 8.90 $\pm$ 1.22   | 3.44 $\pm$ 1.30  | 0.013986 |
| <b>unclassified_Muribaculaceae</b>         | 4.33 $\pm$ 0.63   | 22.95 $\pm$ 3.18 | 0.000999 |
| <b>unclassified_Bacilli</b>                | 4.11 $\pm$ 1.19   | 1.08 $\pm$ 0.23  | 0.003996 |
| <b>Alloprevotella</b>                      | 1.18 $\pm$ 0.74   | 1.04 $\pm$ 3.29  | 0.013986 |
| <b>Colidextribacter</b>                    | 1.19 $\pm$ 0.29   | 0.26 $\pm$ 0.12  | 0.001998 |
| <b>uncultured_Bacteroidales_bacterium</b>  | 0.98 $\pm$ 0.15   | 3.82 $\pm$ 0.64  | 0.000999 |
| <b>[Eubacterium]_xylanophilum_group</b>    | 0.79 $\pm$ 0.26   | 0.05 $\pm$ 0.01  | 0.006993 |
| <b>Lachnospiraceae_UCG_006</b>             | 0.45 $\pm$ 0.08   | 0.07 $\pm$ 0.02  | 0.000999 |
| <b>[Eubacterium]_siraecum_group</b>        | 0.43 $\pm$ 0.18   | 0.04 $\pm$ 0.02  | 0.003996 |
| <b>Bacteroides</b>                         | 0.43 $\pm$ 0.11   | 5.60 $\pm$ 1.67  | 0.000999 |
| <b>unclassified_Peptococcaceae</b>         | 0.41 $\pm$ 0.08   | 0.11 $\pm$ 0.02  | 0.001998 |
| <b>Rikenella</b>                           | 0.22 $\pm$ 0.06   | 0.55 $\pm$ 0.11  | 0.033966 |
| <b>Parasutterella</b>                      | 0.22 $\pm$ 0.13   | 4.92 $\pm$ 1.59  | 0.002997 |
| <b>Parabacteroides</b>                     | 0.18 $\pm$ 0.13   | 1.29 $\pm$ 0.42  | 0.001998 |
| <b>Rikenellaceae_RC9_gut_group</b>         | 0.09 $\pm$ 0.02   | 0.49 $\pm$ 0.07  | 0.000999 |
| <b>uncultured_Muribaculaceae_bacterium</b> | 0.08 $\pm$ 0.01   | 0.26 $\pm$ 0.04  | 0.001998 |
| <b>UCG_005</b>                             | 0.08 $\pm$ 0.03   | 1.33 $\pm$ 0.01  | 0.033966 |
| <b>Muribaculum</b>                         | 0.07 $\pm$ 0.02   | 0.46 $\pm$ 0.04  | 0.000999 |
| <b>Dubosiella</b>                          | 0.06 $\pm$ 0.06   | 1.38 $\pm$ 0.51  | 0.014985 |
| <b>Family_XIII_UCG_001</b>                 | 0.05 $\pm$ 0.002  | 1.10 $\pm$ 0.01  | 0.003996 |
| <b>[Eubacterium]_ruminantium_group</b>     | 0.04 $\pm$ 0.04   | 0                | 0.000999 |
| <b>unclassified_Cyanobacteriales</b>       | 0.03 $\pm$ 0.0009 | 0                | 0.001998 |
| <b>Peptococcus</b>                         | 0.03 $\pm$ 0.01   | 0                | 0.046953 |
| <b>Escherichia_Shigella</b>                | 0.03 $\pm$ 0.01   | 1.07 $\pm$ 0.87  | 0.016983 |
| <b>unclassified_Lactobacillaceae</b>       | 0.02 $\pm$ 0.007  | 0.00             | 0.010989 |
| <b>Streptococcus</b>                       | 0.02 $\pm$ 0.01   | 0.99 $\pm$ 0.35  | 0.003996 |
| <b>uncultured_Clostridia_bacterium</b>     | 0.02 $\pm$ 0.01   | 0.00             | 0.027972 |
| <b>unclassified_Clostridia</b>             | 0.01 $\pm$ 0.001  | 0.07 $\pm$ 0.02  | 0.018981 |
| <b>[Acetivibrio]_ethanolgignens_group</b>  | 0.01 $\pm$ 0.001  | 0                | 0.000999 |
| <b>UCG_003</b>                             | 0.01 $\pm$ 0.0001 | 0                | 0.000999 |
| <b>unclassified_UCG_010</b>                | 0.01 $\pm$ 0.0001 | 0.10 $\pm$ 0.03  | 0.030969 |
| <b>Pediococcus</b>                         | 0.01 $\pm$ 0.0001 | 0                | 0.000999 |
| <b>unclassified_Anaerovoracaceae</b>       | 0.01 $\pm$ 0.0001 | 0.04 $\pm$ 0.01  | 0.030969 |
| <b>[Eubacterium]_oxidoreducens_group</b>   | 0.01              | 0.00             | 0.016983 |
| <b>Bacillus</b>                            | 0.01              | 0.002            | 0.00099  |

|                                       |             |             |                |
|---------------------------------------|-------------|-------------|----------------|
| <b>Limosilactobacillus</b>            | 0.01        | 0.00        | 0.00099        |
| <b>[Eubacterium]_ventriosum_group</b> | <b>0.01</b> | <b>0.00</b> | <b>0.00099</b> |
| <b>Leuconostoc</b>                    | 0.01        | 0.00        | 0.00099        |
| <b>unclassified_Lactobacillales</b>   | <b>0.01</b> | <b>0.00</b> | <b>0.00099</b> |
| <b>unclassified_Beijerinckiaceae</b>  | 0.01        | 0.00        | 0.00099        |
| <b>Candidatus_Udaeobacter</b>         | <b>0.01</b> | <b>0.00</b> | <b>0.00099</b> |
| <b>Dialister</b>                      | 0.01        | 0.00        | 0.00099        |
| <b>Fusobacterium</b>                  | <b>0.01</b> | <b>0.00</b> | <b>0.00099</b> |
| <b>Bifidobacterium</b>                | 0.00        | 0.50±0.17   | 0.008991       |
| <b>Faecalibaculum</b>                 | 0.00        | 0.18±0.08   | 0.003996       |
| <b>Allobaculum</b>                    | 0.00        | 0.79        | 0.000991       |
| <b>Frisingicoccus</b>                 | 0.00        | 0.09±0.08   | 0.000999       |
| <b>Cetobacterium</b>                  | 0.00        | 0.01±00     | 0.000999       |
| <b>Coriobacteriaceae_UCG_002</b>      | 0.00        | 0.11±0.07   | 0.000999       |

---
